# Supplementary material
Source: publisher site journal article supplement (https://www.dovepress.com/article/268523)
Supplement: Supplementary file 1 [file get_supplementary_file.php]

Supplementary Table S1 ICD-9 code for comorbidities

| comorbidities | ICD-9 code |
| --- | --- |
| Congestive heart failure | 4280, 4281, 42820, 42821, 42822, 42823, 42830, 42831,42832, 42833, 42840, 42841,42842, 42823, 4289,40201, 40211, 40291, 40401, 40411, 40491, 40403, 40413,40493 |
| Cardiac arrhythmias | 42610, 42611, 42613, 4262, 4263, 4624, 42650,42651, 42652, 42653, 4266, 4267, 42681, 42682, 42689,4270, 4272, 42731, 42760, 4279, 7850, V450, V4501, V4502, V4509, V5331, V5332, V5339 |
| Valvular disease | 09320, 09321, 09322, 09323, 09324, 3940, 3941, 3942, 3949, 3950, 3951, 3952, 3959, 3960, 3961, 3962, 3963, 3968, 3969, 3970, 3971, 3979, 4240, 4241, 4242, 4243, 42490, 42491, 42499, 7463, 7464, 7465, 7466, V422, V433 |
| Pulmonary circulation disorder | 41511, 41512, 41519, 4160, 4161, 4162, 4168, 4169, 4179 |
| Peripheral vascular disorder | 4400, 4401, 44020, 44021, 44022, 44023, 44024, 44029, 44030, 44031, 44032, 4404, 4408,4409, 44100, 44101, 44102, 44103, 4411, 4412, 4413, 4414, 4415, 4416, 4417, 4419, 4420, 4421, 4422, 4423, 44281, 44282, 44283, 44284, 44289, 4429, 4431, 44321, 44322, 44323, 44324, 44329, 44381, 44382, 44389, 4439, 44421, 44422, 4471, 449, 5571, 5579, V434 |
| Hypertension | 4011, 4019, 64200, 64201, 64202, 64203, 64204, 4010, 4372, 64220, 64221, 64222, 64223, 64224, 40200, 40210, 40290, 40509, 40519, 40599, 40201, 40211, 40291, 40300, 40310, 40390, 40501, 40511, 40591, 64210, 64211, 64212, 64213, 64214, 40301, 40311, 40391, 40400, 40410, 40490, 40401, 40411, 40491, 40402, 40412, 40492, 40403, 40413, 40493, 64270, 64271, 64272, 64273, 64274, 64290, 64291, 64292, 64393, 64294 |
| Paralysis | 34200, 34201, 34202, 34210, 34211, 34212, 34280, 34281, 34282, 34290, 34291, 34292, 3430, 3431, 3432, 3433, 3434, 3438, 3439 , 34400, 34401, 34402, 34403, 34404, 34409, 3441, 3442, 34430, 34431, 34432, 34440, 34441, 34442, 3445, 34460, 34461, 34481, 34489, 3449, 43820, 43821, 43822, 43830, 43831, 43832, 43840, 43841, 43842, 43850, 43851, 43852, 43853, 78072 |
| Other neurological disease | 3300, 3301, 3302, 3303, 3308, 3309, 3310, 33111, 33119, 3312, 3313, 3314, 3315, 3317, 33181, 33182, 33183, 33189, 3319, 3320, 3334, 3335, 3337, 33371, 33372, 33379, 33385, 33394, 3340, 3341, 3342, 3343, 3344, 3348, 3349, 3350, 33510, 33511, 33519, 33520,33521, 33522, 33523, 33524, 33529, 3358, 3359, 3380, 340, 3411, 34120, 34121, 34122, 3418, 3419, 34500, 34501, 34510, 34511, 3452, 3453, 34540, 34541, 34550, 34551, 34560, 34561, 34570, 34571, 34580, 34581, 34590, 34591, 34700, 34701, 34710, 34711, 3483, 64940, 64941, 64942, 64943, 64944, 7687, 76870, 76871, 76872, 76873, 7803, 78031, 78032, 78033, 78039, 78097, 7843 |
| Chronic pulmonary disease | 490, 4910, 4911, 49120, 49121, 49122, 4918, 4919, 4920, 4928, 49300, 49301, 49302, 49310, 49311, 49312, 49320, 49321, 49322, 49381, 49382, 49390, 49391, 49392, 4940, 4941, 4950, 4951, 4952, 4953, 4954, 4955, 4956, 4957, 4958, 4959, 496, 500, 501, 502, 503, 504, 505, 5064 |
| Uncomplicated diabetes | 25000, 25001, 25002, 25003, 25010, 25011, 25012, 25013, 25020, 25021, 25022, 25023, 25030, 25031, 25032, 25033, 64800, 64801, 64802, 64803, 64804, 24900, 24901, 24910, 24911, 24920, 24921, 24930, 24931 |
| Complicated diabetes | 25040, 25041, 25042, 25043, 25050, 25051, 25052, 25053, 25060, 25061, 25062, 25063, 25070, 25071, 25072, 25073, 25080, 25081, 25082, 25083, 25090, 25091, 25092, 25093, 7751, 24940, 24941, 24950, 24951, 24960, 24961, 24970, 24971, 24980, 24981, 24990, 24991 |
| Hypothyroidism | 243, 2440, 2441, 2442, 2448, 2449 |
| Renal failure | 585, 5853, 5854, 5855, 5856, 5859, 586, V420, V451, V560, V561, V562, V5631, V5632, V568, V4511, V4512 |
| Liver disease | 07022, 07023, 07032, 07033, 07044, 07054, 4560, 4561, 45620, 45621, 5710, 5712, 5713, 57140, 57141, 57142, 57149, 5715, 5716, 5718, 5719, 5723, 5728, 5735, V427 |
| Peptic ulcer | 53141, 53151, 53161, 53170, 53171, 53191, 53241, 53251, 53261, 53270, 53271, 53291, 53341, 53351, 53361, 53370, 53371, 53391, 53441, 53451, 53461, 53470, 53471, 53491 |
| AIDS | 042, 0449 |
| Lymphoma | From 20000 to 20238, 20250 to 20301  20302, 20310, 20311, 20312, 20380, 20381, 20382, 2386, 2733, 20302, 20382 |
| Metastatic cancer | 1960, 1961, 1962, 1963, 1965, 1966, 1968, 1969, 1970, 1971, 1972, 1973, 1974, 1975, 1976, 1977, 1978, 1980, 1981, 1982, 1983, 1984, 1985, 1986, 1987, 19881, 19882, 19889, 1990, 1991, 20970, 20971, 20972, 20973, 20974, 20975, 20979, 78951 |
| Solid tumor | From 1400 to1729, 1800 to 1958  1740, 1741, 1742, 1743, 1744, 1745, 1746, 1748, 1749, 1750, 1759, 179, 20900, 20901, 20902, 20903, 20910, 20911, 20912, 20913, 20914, 20915, 20916, 20917, 20920, 20921, 20922, 20923, 20924, 20925, 20926, 20927, 20929, 20930,20931, 20932, 20933, 20934, 20935, 20936, 25801, 25802, 25803 |
| Rheumatoid arthritis | 7010, 7100, 7101, 7102, 7103, 7104, 7105, 7108, 7109, 7140, 7141, 7142, 71430, 71431, 71432, 71433, 7144, 71481, 71489, 7149, 7200, 7201, 7202, 72081, 72089, 7209, 725 |
| Coagulopathy | 2860, 2861, 2862, 2863, 2864, 2865, 2866, 2867, 2869, 2871, 2873, 28731, 28732, 28733, 28739, 2874, 2875, 64930, 64931, 64932, 64933, 64934, 28984 |
| Obesity | 2780, 27800, 27801, 27803, 64910, 64911, 64912, 64913, 64914, V8530~V8539, V854, V8541~V8545, V8554, 79391 |
| Weight loss | 260, 261, 262, 2630, 2631, 2632, 2638, 2639, 78321, 78322 |
| Fluid and electrolyte disorders | 2760, 2761, 2762, 2763, 2764, 27650, 27651, 27652, 2766, 2767, 2768, 2769 |
| Blood loss anemia | 2800, 64820, 64821, 64822, 64823, 64824 |
| Deficiency anemia | 2801, 2808, 2809, 2810, 2811, 2812, 2813, 2814, 2818, 2819, 28521, 28522, 28529, 2859 |
| Alcohol abuse | 2910, 2911, 2912, 2913, 2915, 2918, 29181, 29182, 29189, 2919, 30300, 30301, 30302, 30303, 30390, 30391, 30392, 30393, 30500, 30501, 30502, 30503 |
| Drug abuse | 2920, 29282, 29283, 29284, 29285, 29289, 2929, 30400, 30401, 30402, 30403, 30410, 30411, 30412, 30413, 30420, 30421, 30422, 30423, 30430, 30431, 30432, 30433, 30440, 30441, 30442, 30443, 30450, 30451, 30452, 30453, 30460, 30461, 30462, 30463, 30470, 30471, 30472, 30473, 30480, 30481, 30482, 30483, 30490, 30491, 30492, 30493, 30520, 30521, 30522, 30523, 30530, 30531, 30532, 30533, 30540, 30541, 30542, 30543, 30550, 30551, 30552, 30553, 30560, 30561, 30562, 30563, 30570, 30571, 30572, 30573, 30580, 30581, 30582, 30583, 30590, 30591, 30592, 30593, 64830, 64831, 64832, 64833, 64834 |
| Psychoses | From 2950 to 2989, 29910, 29911 |
| Depression | 3004, 30112, 3090, 3091, 311 |
